# Supplementary material
Source: MDPI journal article supplement (https://www.mdpi.com/2624-781X/4/4/33)
Supplement: s1 [file s1]

# Supplementary Materials

## Multicomponent Reactions Promoted by Ecocatalyst from Metal Hyperaccumulating Plant *Pluchea sagittalis*

Leonardo H. R. Alporti <sup>1</sup>, Monize Picinini <sup>2</sup>, Ernesto A. Urquieta-Gonzalez <sup>2,\*</sup>, Caroline S. da Silva <sup>3</sup>, Simone Y. S. Silva <sup>4</sup>, Sebastião C. Silva <sup>4</sup>, Marilene N. de Oliveira <sup>4</sup>, Juliana Viera <sup>3,5</sup>, Maria Fatima das G. F. da Silva <sup>1</sup> and Arlene G. Corrêa <sup>1,\*</sup>

<sup>1</sup> Centre of Excellence for Research in Sustainable Chemistry, Department of Chemistry, Federal University of São Carlos, São Carlos 13565-905, SP, Brazil

<sup>2</sup> Department of Chemical Engineering, Federal University of São Carlos, São Carlos 13565-905, SP, Brazil

<sup>3</sup> Group for Applied Instrumental Analysis, Department of Chemistry, Federal University of São Carlos, São Carlos 13565-905, SP, Brazil

<sup>4</sup> Department of Chemistry, Federal University of South and Southeast of Pará, Marabá 68507-590, PA, Brazil

<sup>5</sup> Faculty of Chemistry, Universidad de la República, Montevideo 11800, Uruguay

\* Correspondence: urquieta@ufscar.br (E.A.U.-G.); agcorrea@ufscar.br (A.G.C.)

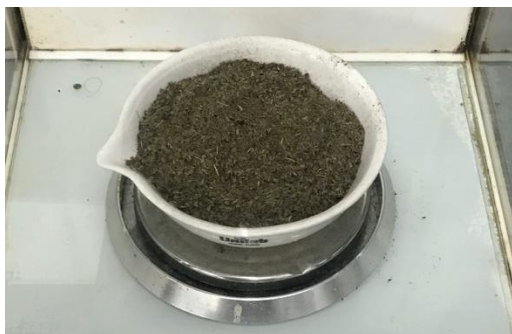

(a)

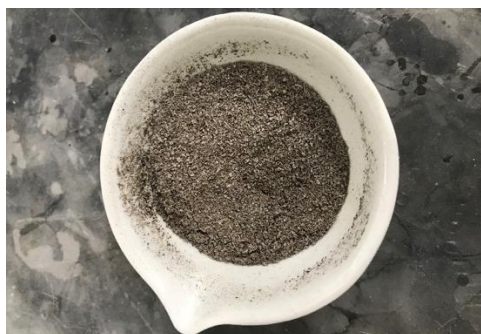

(b)

**Figure S1.** *Pluchea sagittalis* leaves (a) dried and ground. (b) ashes after calcination.

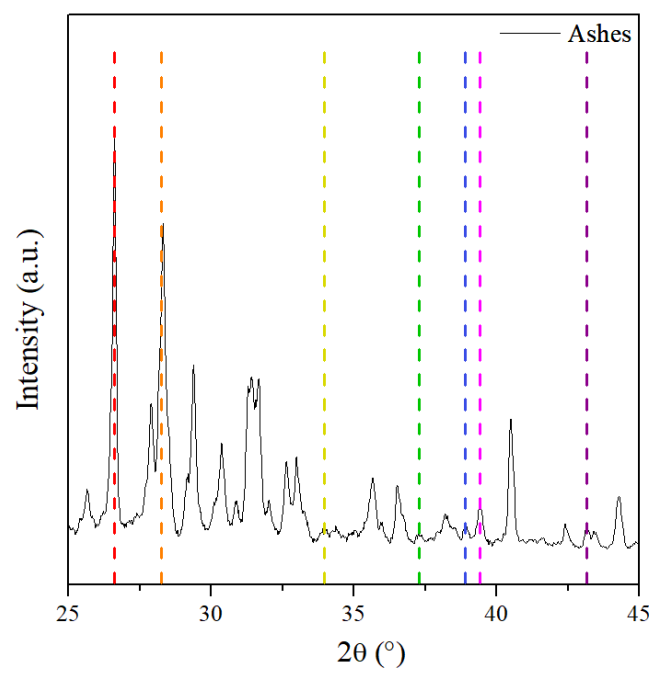

**Figure S2.** Enlarged ashes diffractogram between 25 to 45° 2θ

**Table S1.** Metal concentrations (ICP-OES) in plants collected at a mining area on northern Brazil.

| <b>Sample</b>                   | <b>Ba<br/>(mg kg<sup>-1</sup>)</b> | <b>Ca<br/>(%)</b> | <b>Cd<br/>(mg kg<sup>-1</sup>)</b> | <b>Cr<br/>(mg kg<sup>-1</sup>)</b> | <b>Cu<br/>(mg kg<sup>-1</sup>)</b> | <b>Fe<br/>(%)</b> | <b>K<br/>(%)</b> | <b>Mg<br/>(%)</b> | <b>Na<br/>(mg kg<sup>-1</sup>)</b> | <b>Ni<br/>(mg kg<sup>-1</sup>)</b> | <b>Pb<br/>(mg kg<sup>-1</sup>)</b> | <b>S<br/>(mg kg<sup>-1</sup>)</b> |
|---------------------------------|------------------------------------|-------------------|------------------------------------|------------------------------------|------------------------------------|-------------------|------------------|-------------------|------------------------------------|------------------------------------|------------------------------------|-----------------------------------|
| <i>C. pachystachya</i> leaves   | 21.93                              | 1.12              | <0.015                             | <2.54                              | 83.0                               | 0.35              | 2.60             | 0.28              | 0.52                               | 3.6                                | <0.49                              | 0.47                              |
| <i>C. pachystachya</i> branches | 5.19                               | 0.72              | <0.015                             | <2.54                              | 374                                | 0.39              | 1.69             | 0.39              | 0.01                               | 52.5                               | <0.49                              | 0.56                              |
| <i>P. sagittalis</i> leaves     | 1.39                               | 1.53              | <0.015                             | <2.54                              | 567                                | 1.0               | 2.84             | 0.50              | 0.42                               | 31.4                               | <0.49                              | 1.46                              |
| <i>P. sagittalis</i> flowers    | 4.64                               | 1.00              | <0.015                             | <2.54                              | 174.1                              | 0.55              | 0.48             | 0.51              | 0.05                               | 49.8                               | <0.49                              | 1.61                              |
| <i>T. domingensis</i> leaves    | 4.25                               | 0.89              | <0.015                             | <2.54                              | 56.8                               | 0.55              | 3.85             | 0.47              | 0.80                               | 23.7                               | <0.49                              | 0.25                              |

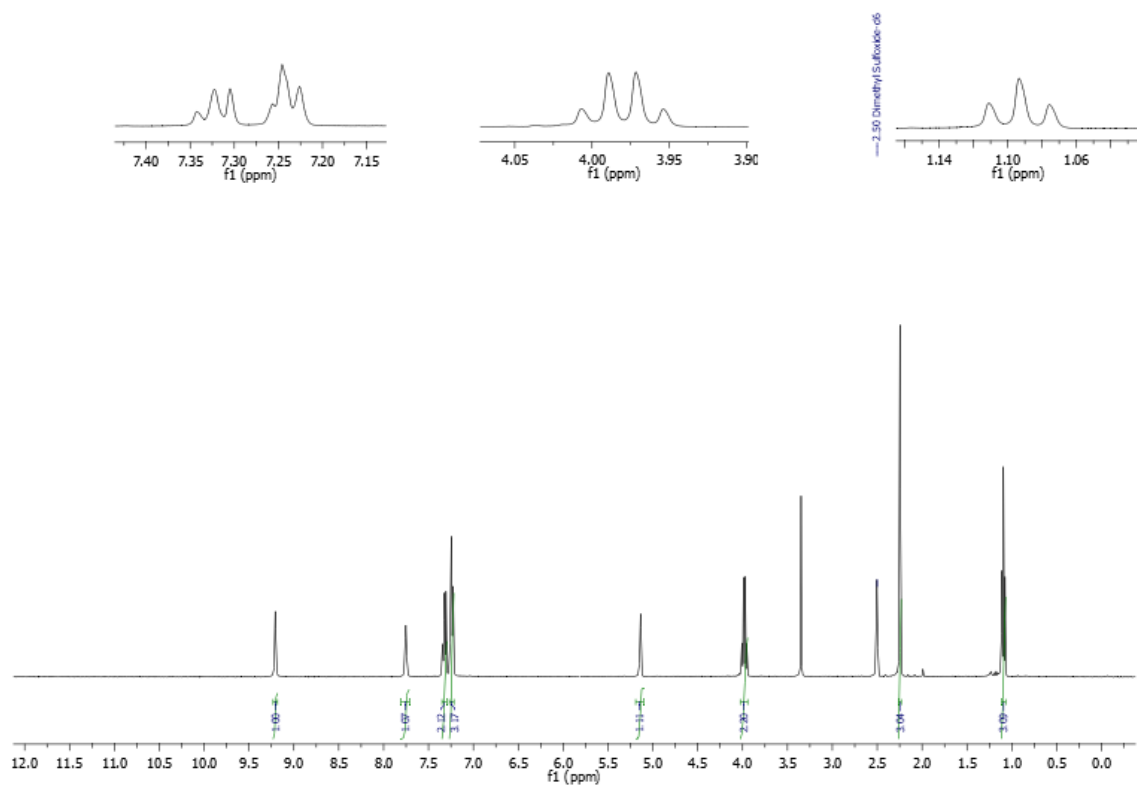

**Figure S3.**  $^1\text{H}$  NMR ( $\text{DMSO}-d_6$ ) of compound **3a**.

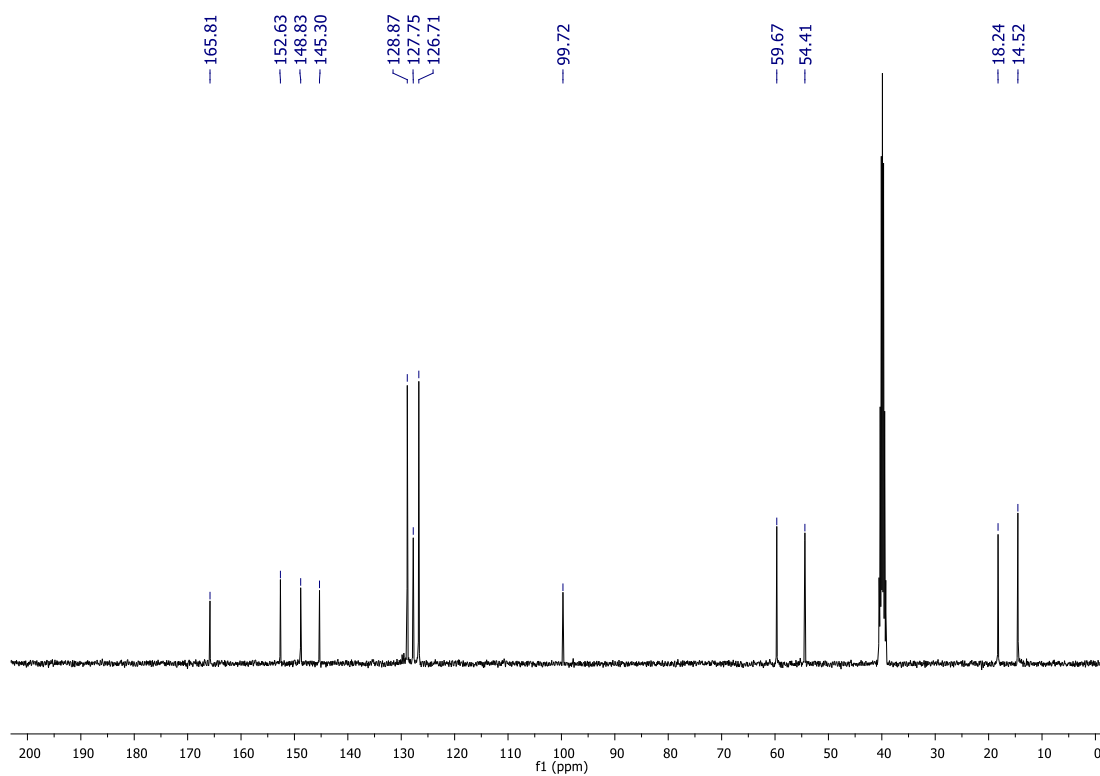

**Figure S4.**  $^{13}\text{C}$  NMR ( $\text{DMSO}-d_6$ ) of compound **3a**.

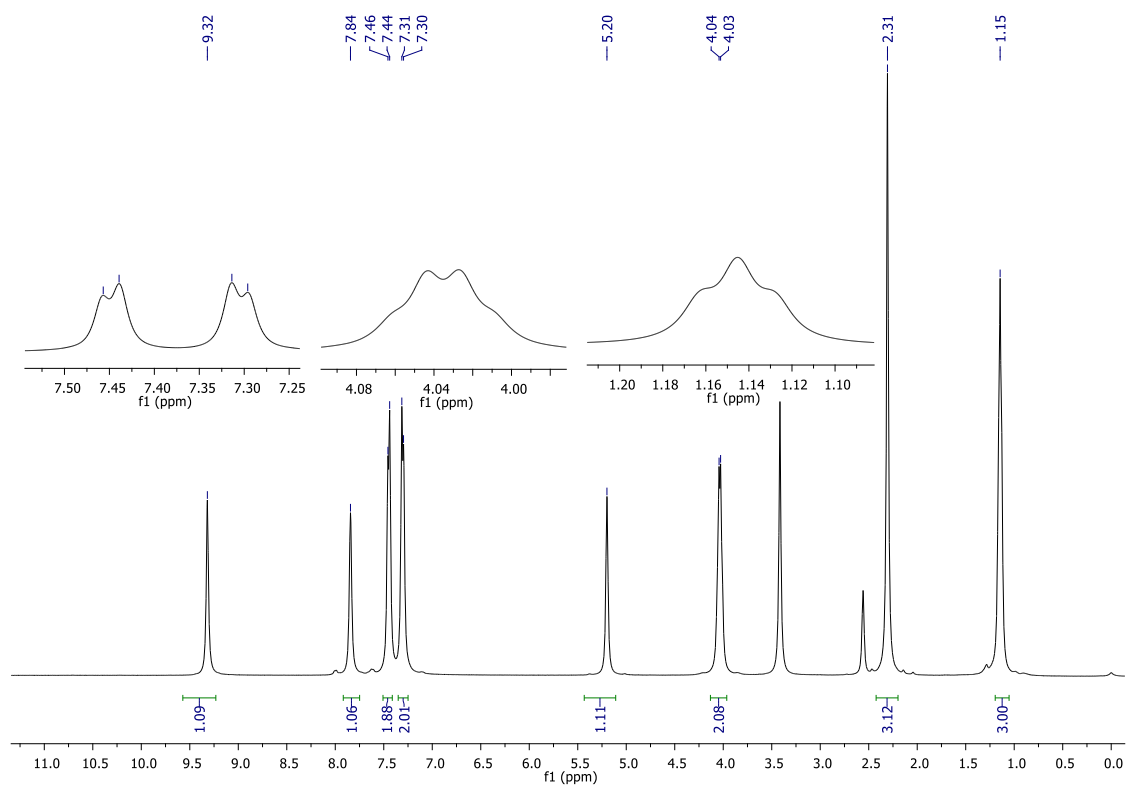

**Figure S5.** <sup>1</sup>H NMR (DMSO-*d*<sub>6</sub>) of compound **3b**.

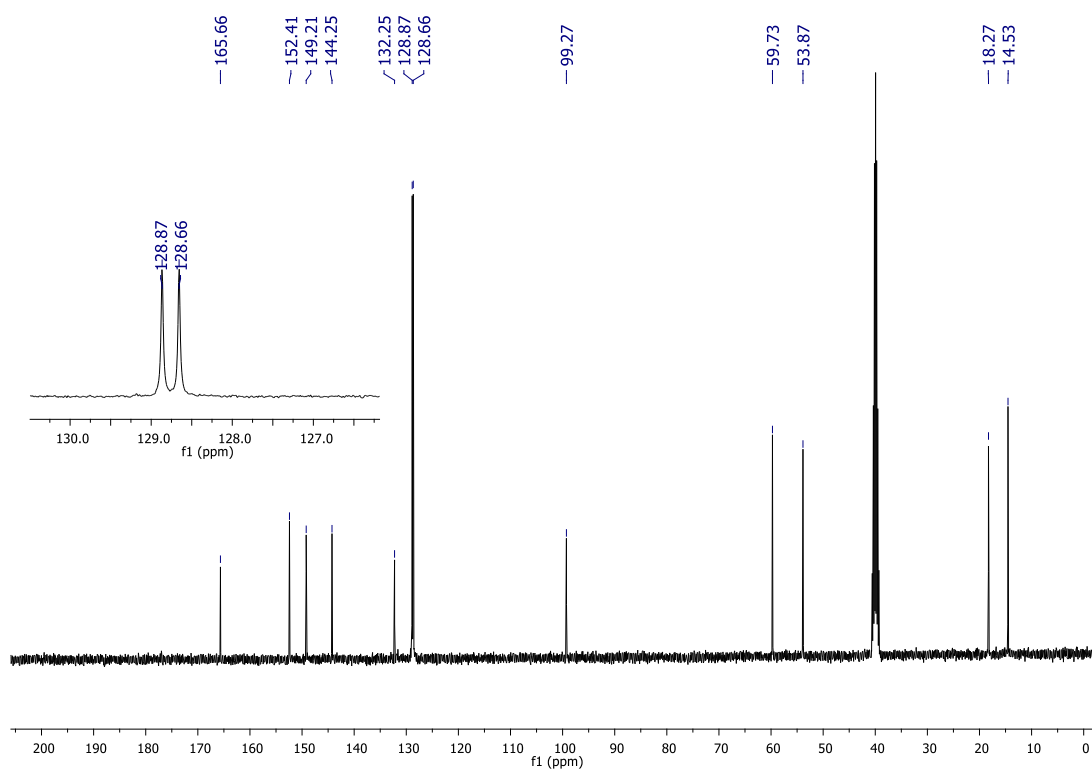

**Figure S6.** <sup>13</sup>C NMR (DMSO-*d*<sub>6</sub>) of compound **3b**.

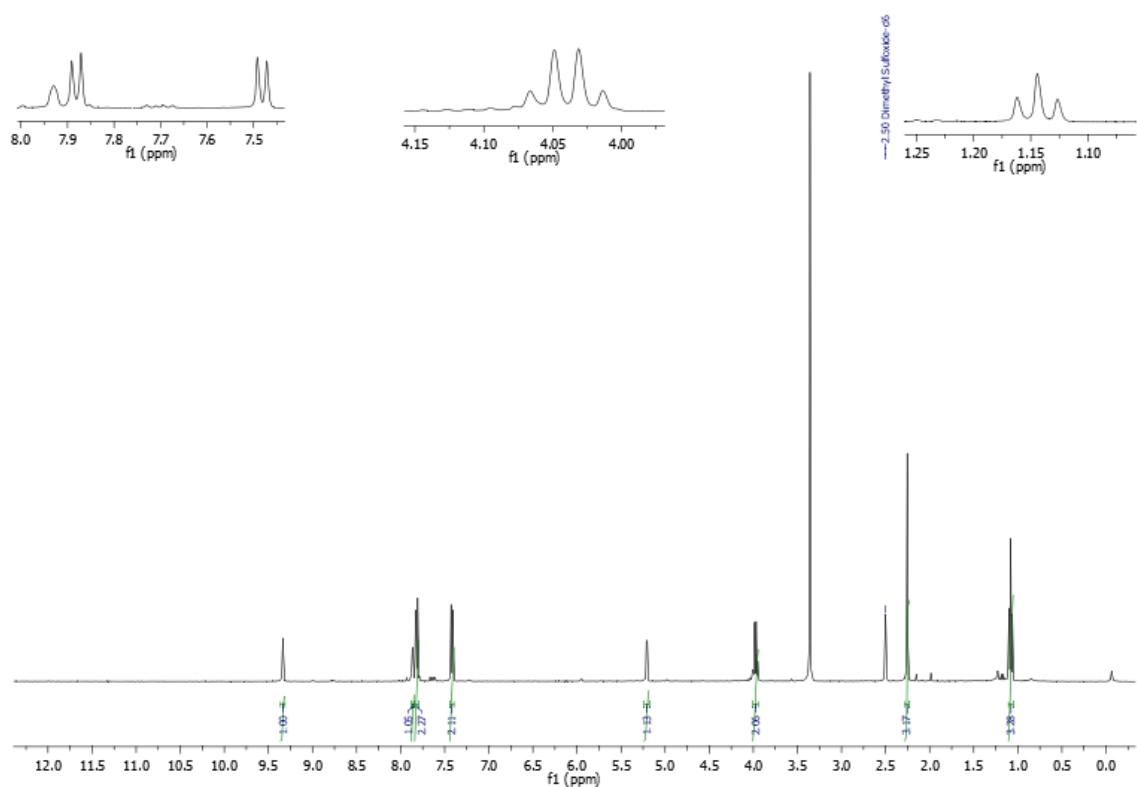

**Figure S7.**  $^1\text{H}$  NMR (DMSO- $d_6$ ) of compound **3c**.

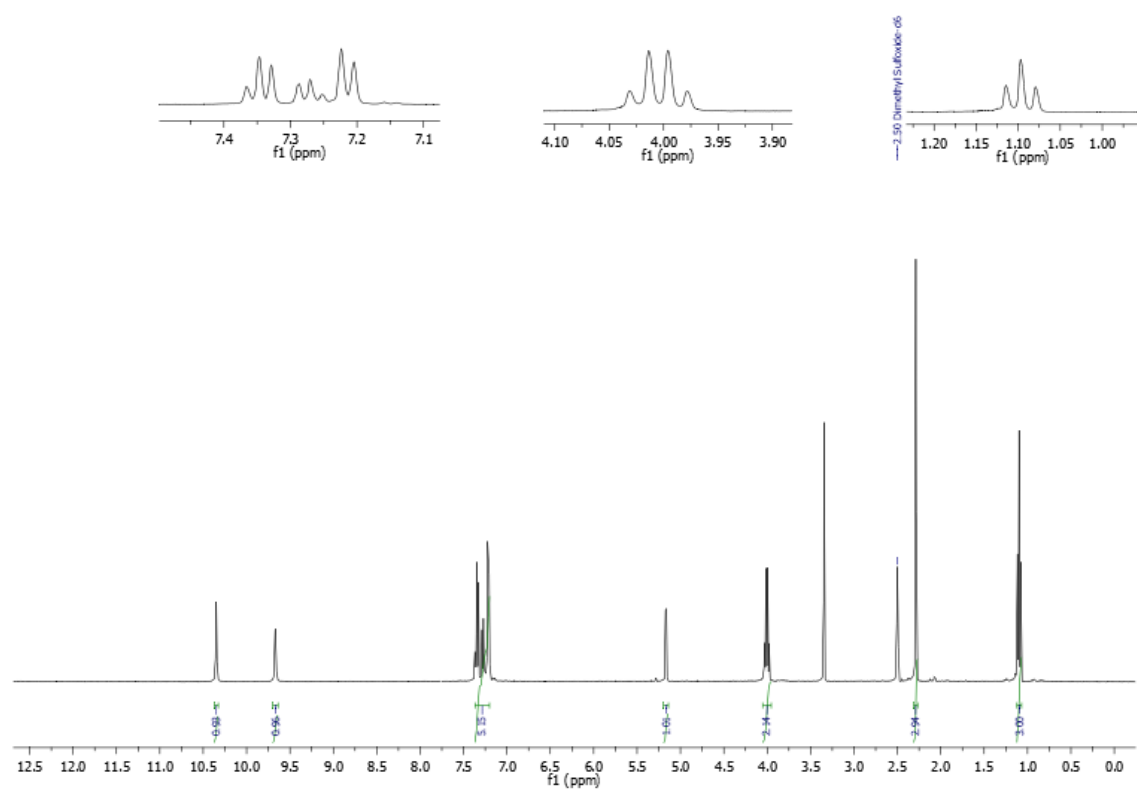

**Figure S8.**  $^1\text{H}$  NMR (DMSO- $d_6$ ) of compound **3d**.

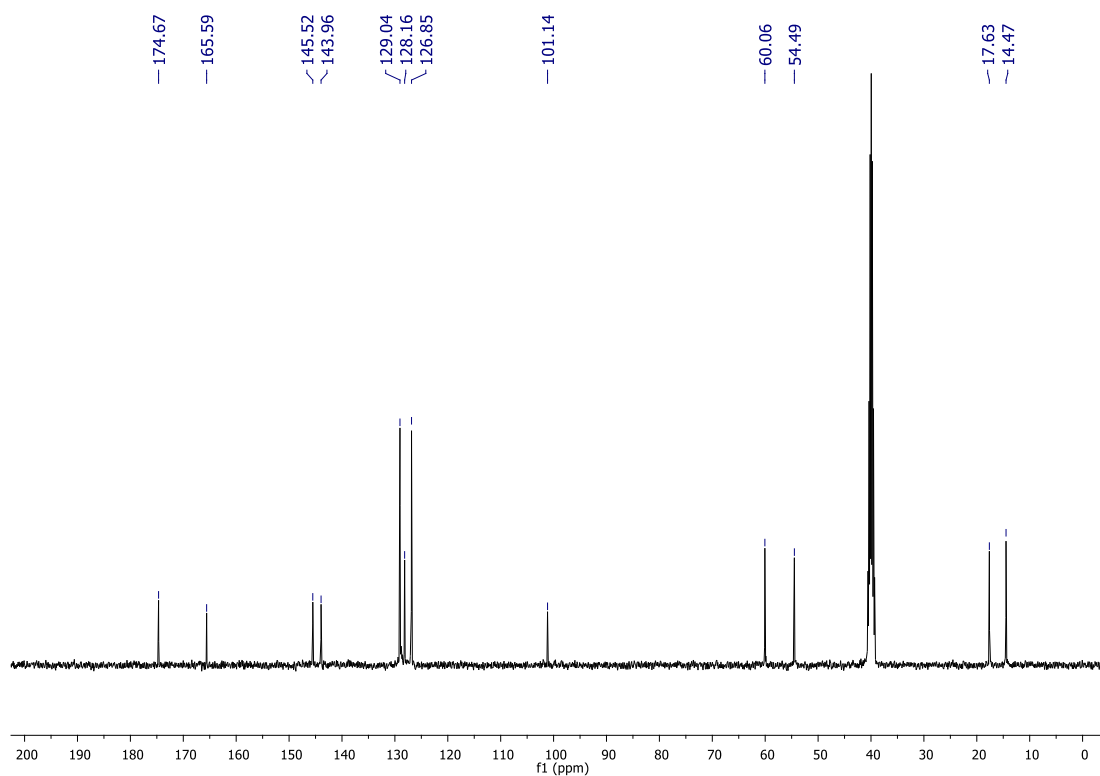

**Figure S9.**  $^{13}\text{C}$  NMR (DMSO- $d_6$ ) of compound **3d**.

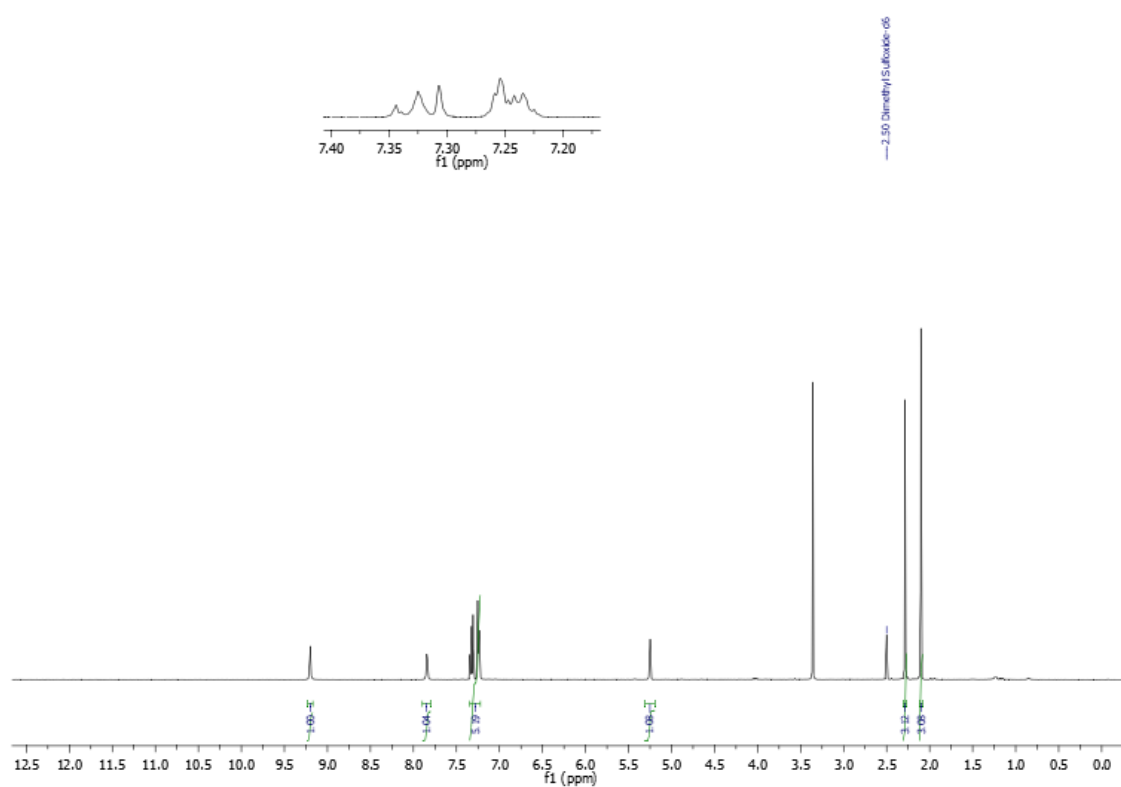

**Figure. S10.**  $^1\text{H}$  NMR (DMSO- $d_6$ ) of compound **3e**.

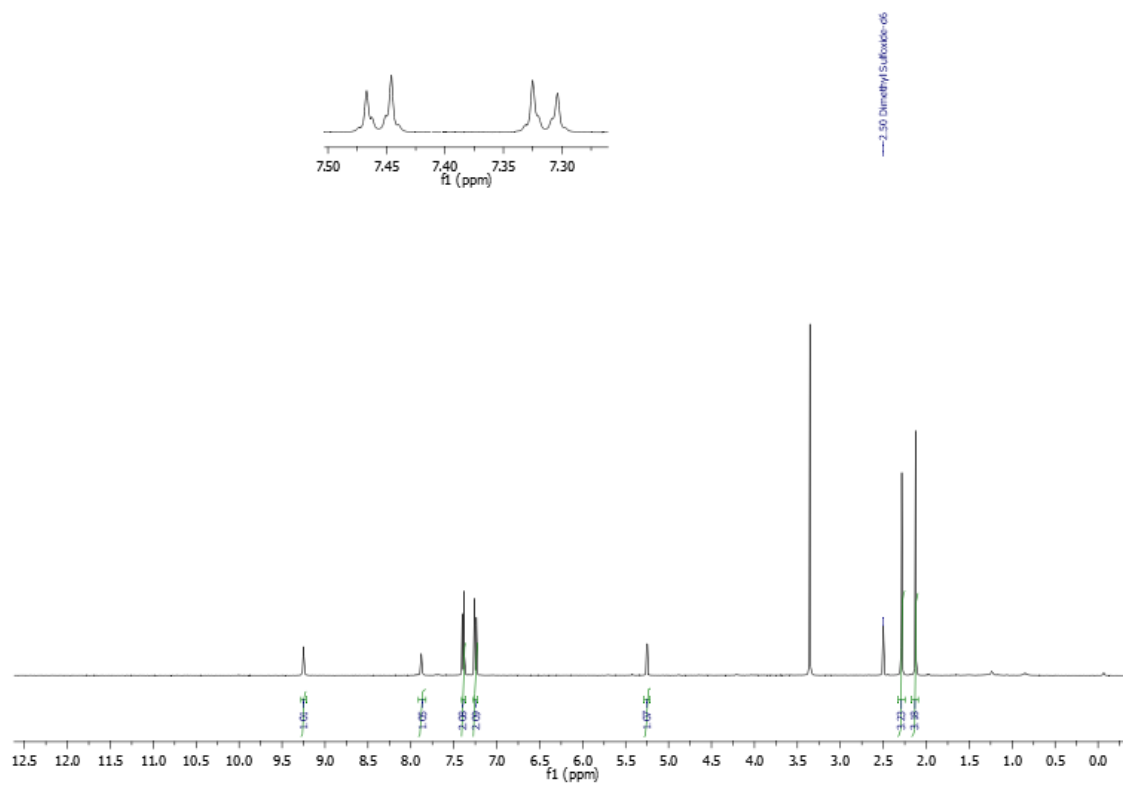

**Figure S11.**  $^1\text{H}$  NMR (DMSO- $d_6$ ) of compound **3f**.

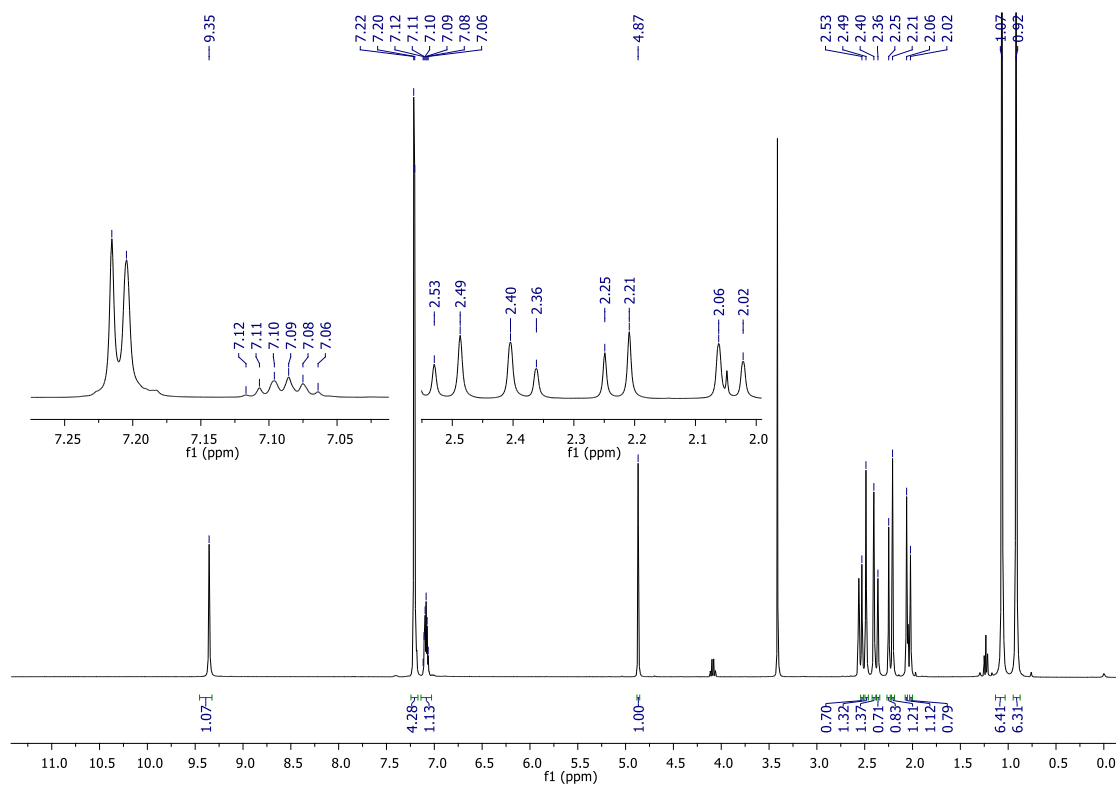

**Figure S12.**  $^1\text{H}$  NMR (DMSO- $d_6$ ) of compound **5a**.





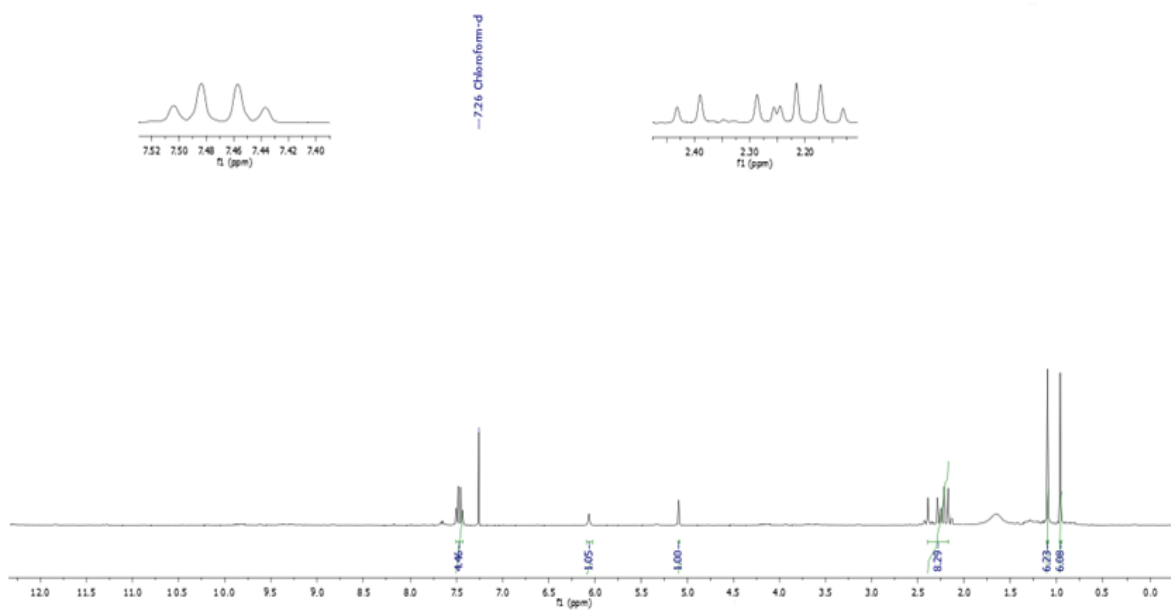

**Figure S15.** <sup>1</sup>H NMR (CDCl<sub>3</sub>) of compound **5c**.

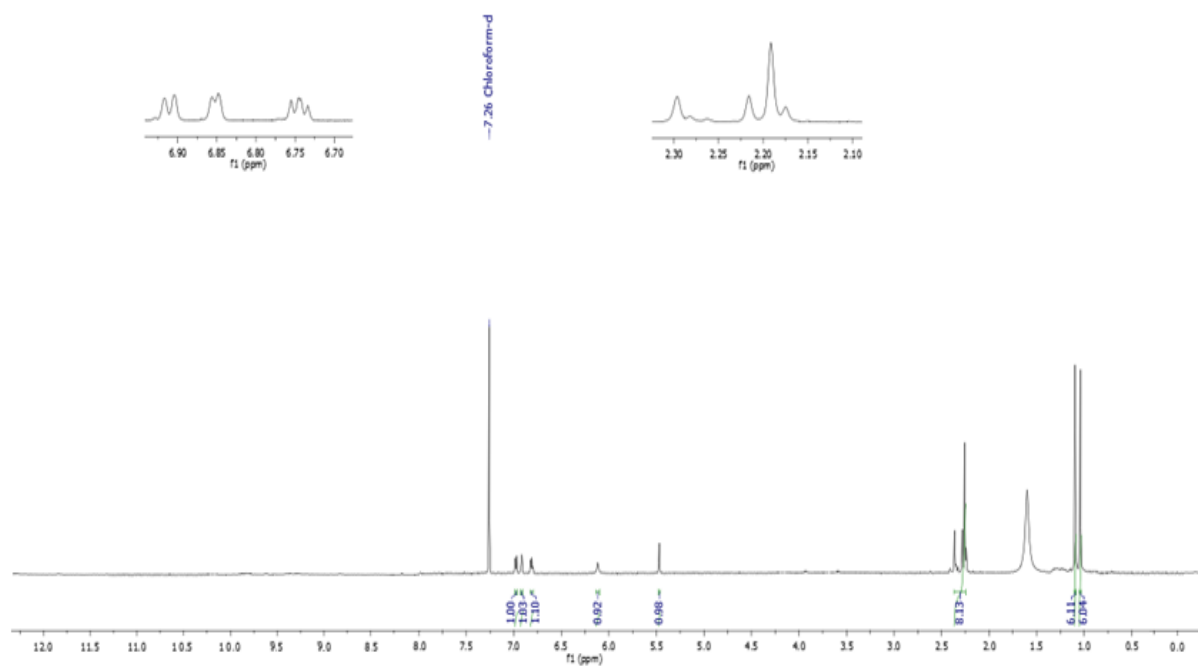

**Figure S16.** <sup>1</sup>H NMR (CDCl<sub>3</sub>) of compound **5d**.

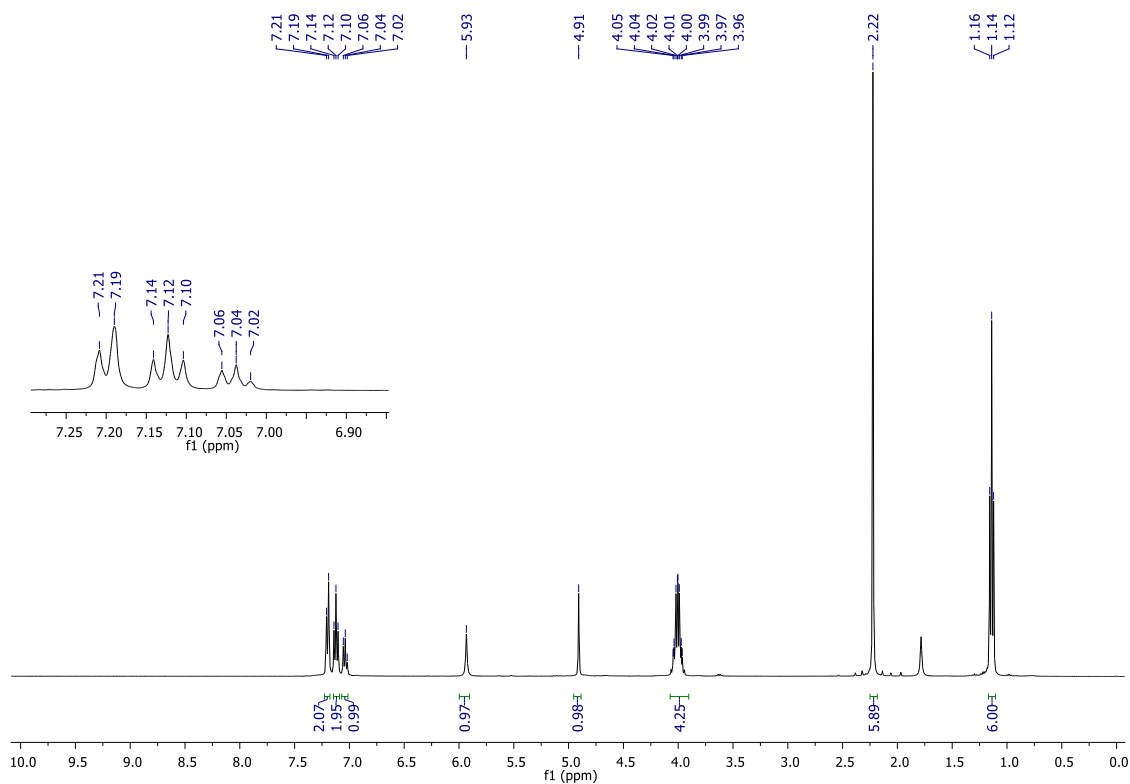

**Figure S17.** <sup>1</sup>H NMR (CDCl<sub>3</sub>) of compound **5e**.

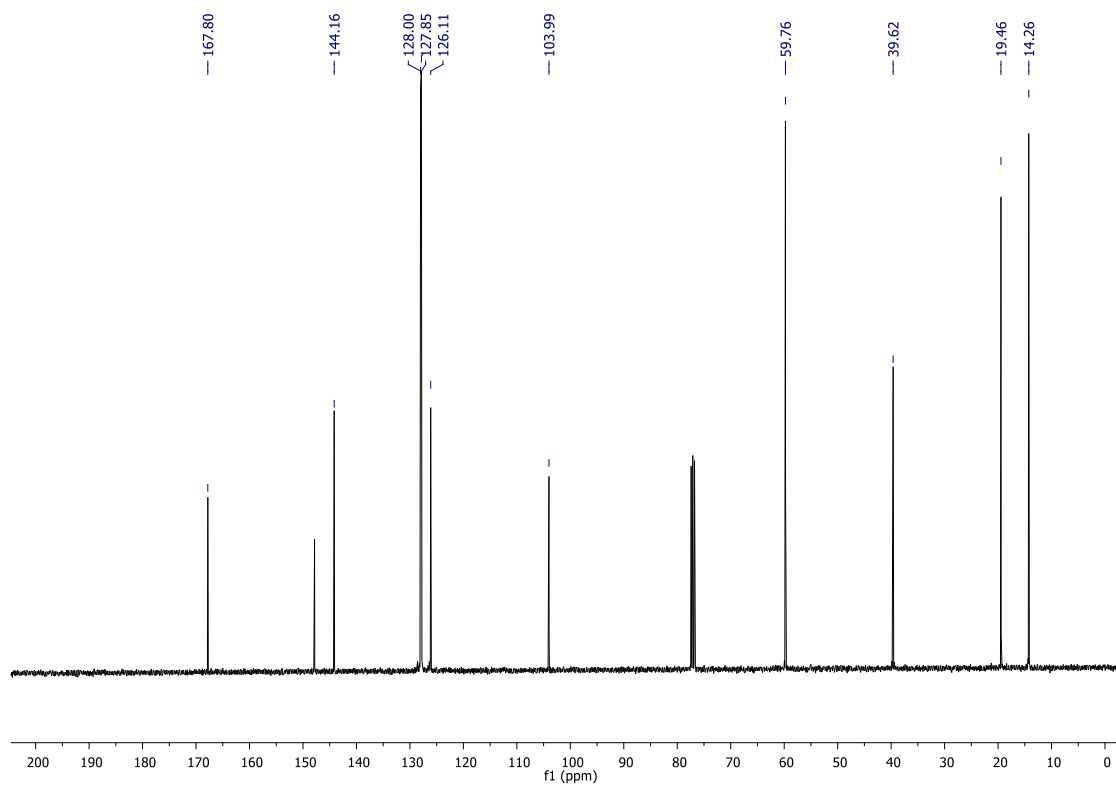

**Figure S18.** <sup>13</sup>C NMR (CDCl<sub>3</sub>) of compound **5e**.

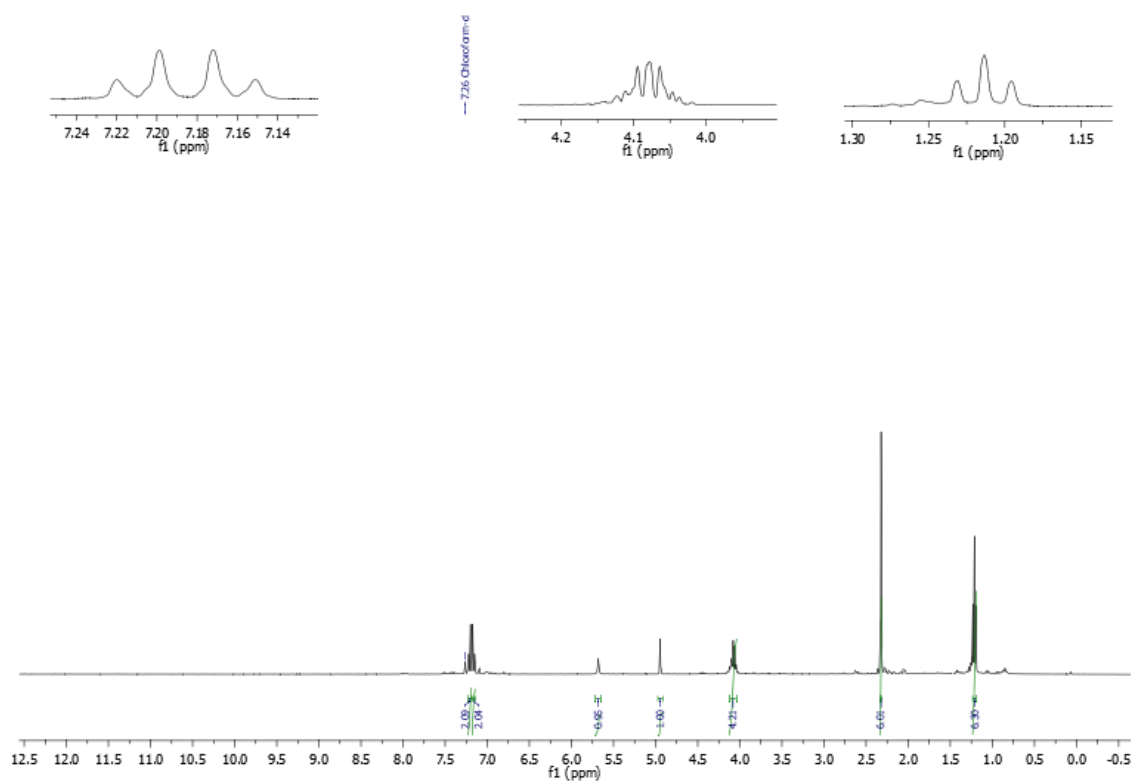

**Figure S19.**  $^1\text{H}$  NMR ( $\text{CDCl}_3$ ) of compound **5f**.
